# Supplementary material for: Machine learning classifiers provide insight into the relationship between microbial communities and bacterial vaginosis
Source: PubMed Central journal article supplement (PMC4542107; doi:10.1186/s13040-015-0055-3), 2015-08-12

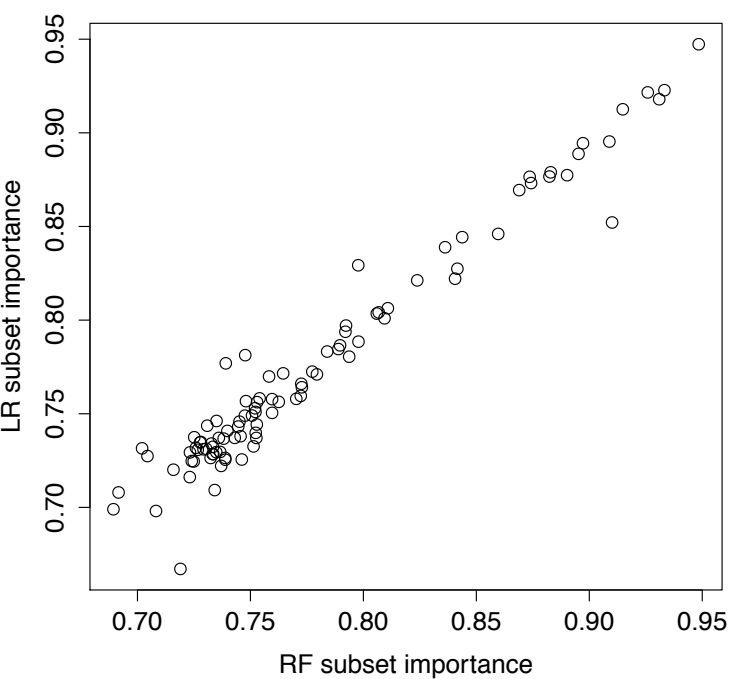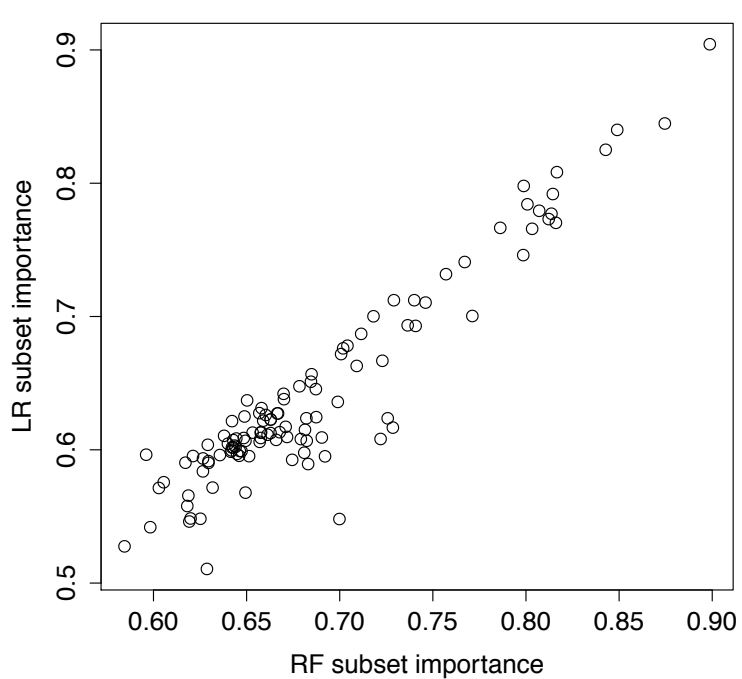

Supplement: 13040_2015_55_MOESM1_ESM.pdf [file 13040_2015_55_MOESM1_ESM.pdf]
