# Supplementary material for: Machine learning classifiers provide insight into the relationship between microbial communities and bacterial vaginosis
Source: PubMed Central journal article supplement (PMC4542107; doi:10.1186/s13040-015-0055-3), 2015-08-12
Supplement: 13040_2015_55_MOESM3_ESM.pdf [file 13040_2015_55_MOESM3_ESM.pdf]

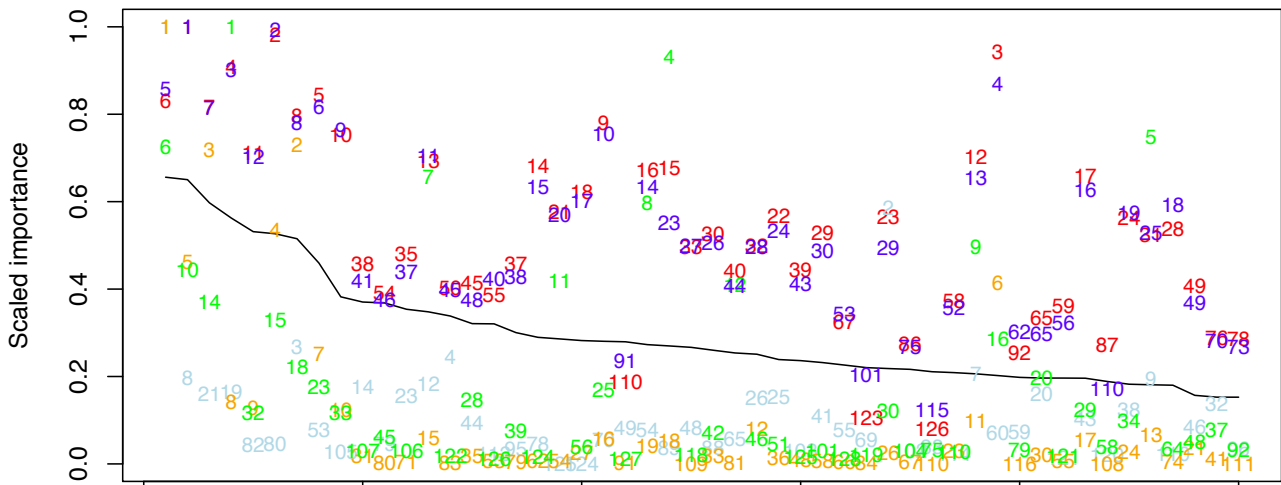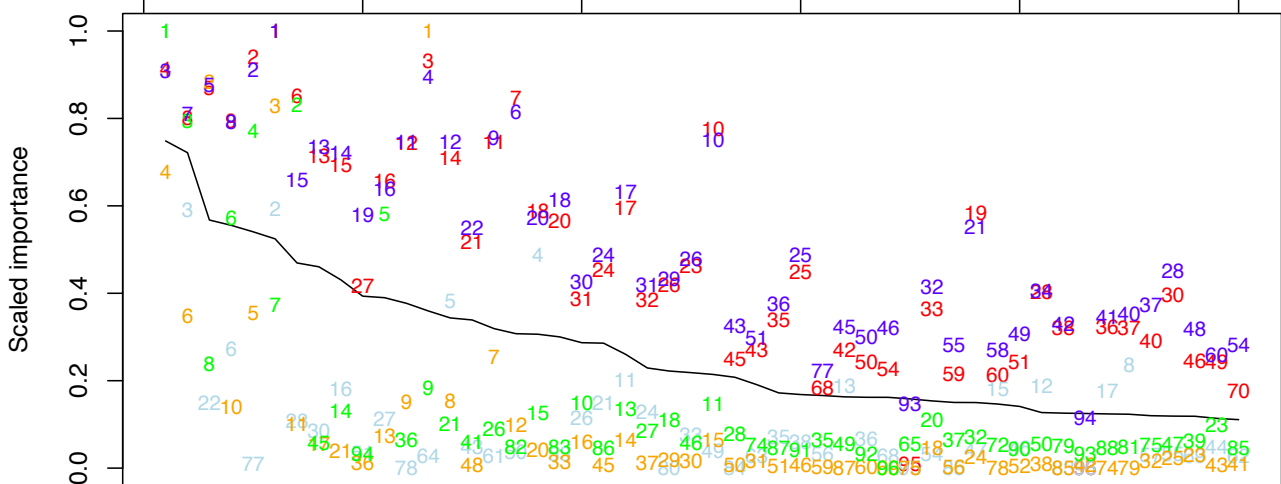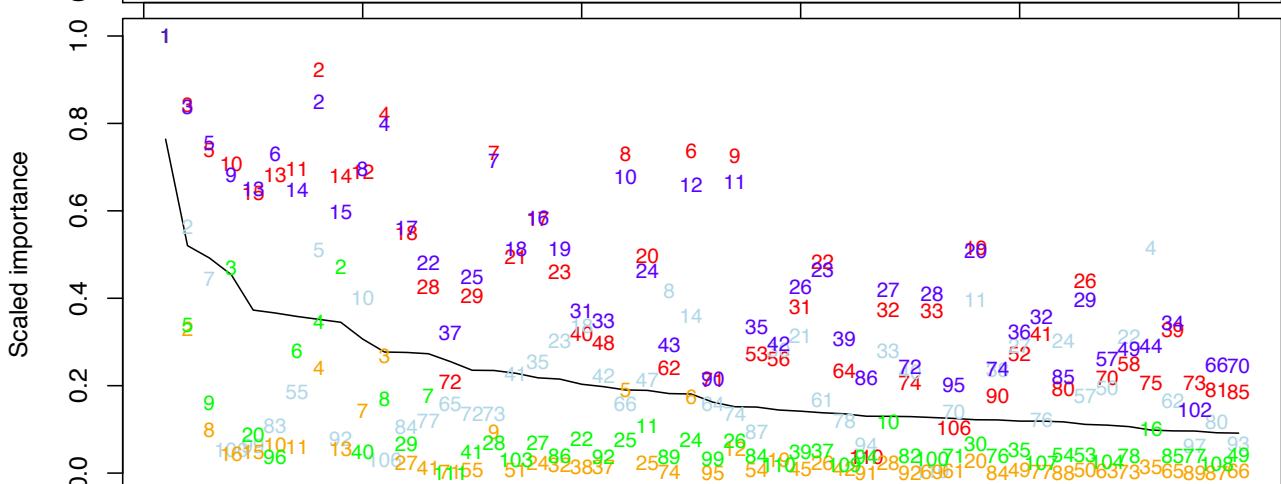

Features ranked by correlation

- LR: subset
- RF: subset
- reliefF
- LR: coef
- RF: INP
- Correlation
